# Supplementary material for: Deep learning-based polygenic risk analysis for Alzheimer’s disease prediction
Source: PubMed Central journal article supplement (PMC10079691; doi:10.1038/s43856-023-00269-x), 2023-04-06
Supplement: 43856_2023_269_MOESM3_ESM.pdf [file 43856_2023_269_MOESM3_ESM.pdf]

## **Description of Additional Supplementary Files**

**File Name:** Supplementary Data

**Description:** Supplementary Data 1–10
